# Supplementary material for: Degradation and Mineralization of Benzohydroxamic Acid by Synthesized Mesoporous La/TiO2
Source: PubMed Central journal article supplement (PMC5086736; doi:10.3390/ijerph13100997), 2016-10-10
Supplement: ijerph-13-00997-s001.pdf [file ijerph-13-00997-s001.pdf]

## Supplementary Materials: Degradation and Mineralization of Benzohydroxamic Acid by Synthesized Mesoporous La/TiO<sub>2</sub>

Xianping Luo, Junyu Wang, Chunying Wang, Sipin Zhu, Zhihui Li, Xuekun Tang and Min Wu

Table S1. The emission range of 100 W and 300 W Mercury.

| Intensity (%) | Wavelength (nm) |
|---------------|-----------------|
| 15.3          | 265.2–265.5     |
| 16.6          | 296.7           |
| 23.9          | 302.2–302.8     |
| 49.9          | 312.6–313.2     |
| 100.0         | 365.0–366.3     |
| 42.2          | 404.5–407.8     |
| 77.5          | 435.8           |
| 546.1         | 577.0–579.0     |
| 93.0          | 76.5            |

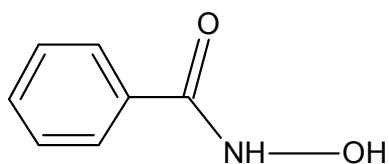

Figure S1. Structure of benzohydroxamic acid.

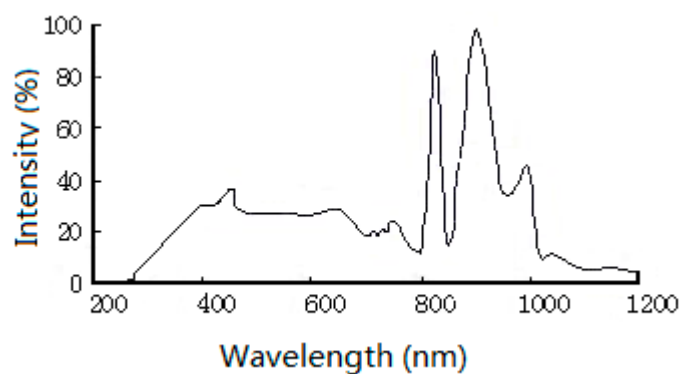

Figure S2. The emission range of the 500 W xenon lamp.

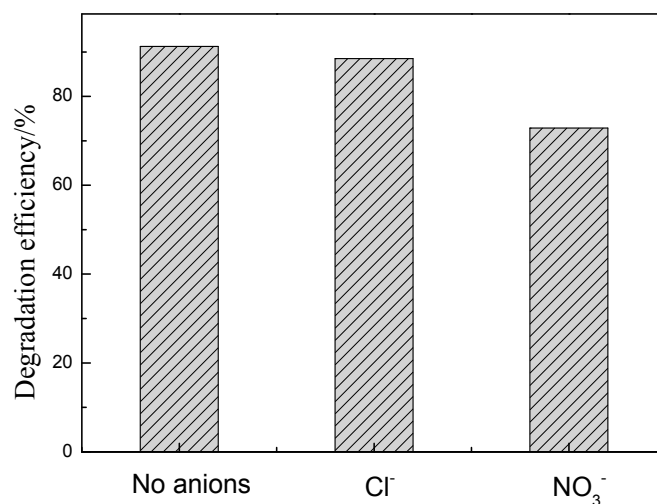

**Figure S3.** Effect of inorganic anions Cl<sup>-</sup> and NO<sub>3</sub><sup>-</sup> on photocatalytic degradation of benzohydroxamic acid.

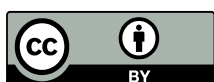

© 2016 by the authors; licensee MDPI, Basel, Switzerland. This article is an open access article distributed under the terms and conditions of the Creative Commons by Attribution (CC-BY) license (<http://creativecommons.org/licenses/by/4.0/>)
